# Supplementary material for: Dispensation of long-acting agonists with or without inhaled corticosteroids, and risk of asthma-related hospitalisation: a population-based study
Source: HighWire-hosted journal article supplement (doi:10.1136/thoraxjnl-2013-203998), 2013-11-26
Supplement: thoraxjnl-2013-203998supp.pdf [file thoraxjnl-2013-203998supp.pdf]

## Contents

- 1- [List of asthma-related medications used for cohort definition and the assessment of asthma severity](#)
- 2- [Detailed description of the statistical models](#)
- 3- [Regression coefficients for the main analysis](#)
- 4- [Description and results of the sensitivity analyses](#)

## 1. Asthma-related medications per Categories, Active ingredients, Anatomical Therapeutic Chemical (ATC) codes and Drug Identification Numbers (DIN) selected in the PharmaNet database

All medications are used in calculating the number of asthma-related dispensations as a measure of asthma severity; but only a subset of the list is used for the case definition (refer to the right-most column)

| Medication categories                                                                                            | Active ingredient(s)   | ATC     | DIN                                                                                                                                                                                                                                                                                                                                                                                                                                                                                                                     | Used in case definition? |
|------------------------------------------------------------------------------------------------------------------|------------------------|---------|-------------------------------------------------------------------------------------------------------------------------------------------------------------------------------------------------------------------------------------------------------------------------------------------------------------------------------------------------------------------------------------------------------------------------------------------------------------------------------------------------------------------------|--------------------------|
| Used in the 'narrow definition' of resource use (short list), also used for case-definition of asthma (see text) |                        |         |                                                                                                                                                                                                                                                                                                                                                                                                                                                                                                                         |                          |
| Inhaled corticosteroids (ICS)                                                                                    | Beclomethasone         | R03BA01 | 2242030, 2242029, 374407, 828521, 828548, 872334, 893633, 897353, 1949993, 1950002, 2079976, 2213710, 2213729, 2215039, 2215047, 2215055, 2216531                                                                                                                                                                                                                                                                                                                                                                       | Y                        |
|                                                                                                                  | Budesonide             | R03BA02 | 2229099, 1978918, 1978926, 852074, 851752, 851760                                                                                                                                                                                                                                                                                                                                                                                                                                                                       | Y                        |
|                                                                                                                  | Fluticasone            | R03BA05 | 2237247, 2237246, 2237245, 2237244, 2244293, 2244292, 2244291, 2174731, 2174758, 2174766, 2174774, 2213583, 2213591, 2213605, 2213613                                                                                                                                                                                                                                                                                                                                                                                   | Y                        |
|                                                                                                                  | Ciclesonide            | R03BA08 | 2285614, 2285606, 2303671                                                                                                                                                                                                                                                                                                                                                                                                                                                                                               | Y                        |
| Short-acting beta-agonists (SABA)                                                                                | Salbutamol             | R03AC02 | 790419, 812463, 832758, 832766, 851841, 860808, 867179, 897345, 1926934, 1938851, 1938878, 1945203, 1947222, 1986864, 2022125, 2046741, 2048760, 2069571, 2084333, 2148617, 2154412, 2173360, 2208229, 2208237, 2208245, 2212315, 2212323, 2213400, 2213419, 2213427, 2213478, 2213486, 2214997, 2215004, 2215616, 2215624, 2215632, 2216949, 2231430, 2231488, 2231678, 2231783, 2231784, 2232570, 2232987, 2236931, 2236932, 2236933, 2239365, 2239366, 2241497, 2243115, 2243828, 2244914, 2245669, 2259583, 2326450 | Y                        |
|                                                                                                                  |                        | R03CC02 | 620955, 620963, 874086, 894249, 894257, 1932691, 2035421, 2063689, 2091186, 2146843, 2146851, 2164434, 2164442, 2165368, 2165376, 2212390, 2213435, 2213443, 2213451, 2261324                                                                                                                                                                                                                                                                                                                                           | Y                        |
|                                                                                                                  | Terbutaline            | R03AC03 | 786616                                                                                                                                                                                                                                                                                                                                                                                                                                                                                                                  | Y                        |
|                                                                                                                  | Orciprenaline          | R03CB03 | 249920, 3891, 2236783, 2229862, 2152568, 2192675                                                                                                                                                                                                                                                                                                                                                                                                                                                                        | Y                        |
|                                                                                                                  |                        |         |                                                                                                                                                                                                                                                                                                                                                                                                                                                                                                                         |                          |
| Long-acting beta-agonists (LABA)                                                                                 | Salmeterol             | R03AC12 | 2211742, 2214261, 2231129, 2136139, 2136147                                                                                                                                                                                                                                                                                                                                                                                                                                                                             | Y                        |
|                                                                                                                  | Formoterol             | R03AC13 | 2230898, 2237224, 2237225                                                                                                                                                                                                                                                                                                                                                                                                                                                                                               | Y                        |
| ICS and LABA in combination (ICS+LABA)                                                                           | Budesonide, formoterol | R03AK07 | 2245385, 2245386                                                                                                                                                                                                                                                                                                                                                                                                                                                                                                        | Y                        |

|                                           |                                |                         |                                                                                                                                                                                                                                                                                                         |   |
|-------------------------------------------|--------------------------------|-------------------------|---------------------------------------------------------------------------------------------------------------------------------------------------------------------------------------------------------------------------------------------------------------------------------------------------------|---|
|                                           | Fluticasone, salmeterol        | R03AK06                 | 2240835, 2245126, 2245127, 2240836, 2240837                                                                                                                                                                                                                                                             | Y |
| Leukotriene receptor antagonists (LTRA)   | Montelukast                    | R03DC03                 | 2247997, 2238217, 2243602, 2238216                                                                                                                                                                                                                                                                      | Y |
|                                           | Zafirlukast                    | R03DC01                 | 2236606                                                                                                                                                                                                                                                                                                 | Y |
|                                           | <del>Zileuton</del>            | Not available in Canada |                                                                                                                                                                                                                                                                                                         |   |
| Anti-immunoglobulin E monoclonal antibody | Omalizumab                     | R03DX05                 | 2260565                                                                                                                                                                                                                                                                                                 | Y |
| Inhaled mast cell stabilizers             | Cromoglicic acid (cromolyn)    | R03BC01                 | 2231431, 2231671, 2046113, 534609, 555649, 261238, 638641, 2049082, 2219468                                                                                                                                                                                                                             | Y |
| Theophylline                              | Choline theophyllinate         | R03DA02                 | 346071, 405310, 441724, 441732, 451282, 458708, 458716, 476366, 476390, 476412, 503436, 511692, 536709, 565377, 589942, 589950, 792934                                                                                                                                                                  | Y |
|                                           | Theophylline                   | R03DA04                 | 156701, 261203, 460982, 460990, 461008, 466409, 488070, 532223, 556742, 575151, 599905, 627410, 631698, 631701, 692689, 692697, 692700, 722065, 1926586, 1926594, 1926608, 1926616, 1926640, 1966219, 1966227, 1966235, 1966243, 1966251, 1966278, 1966286, 2014165, 2014181, 2230085, 2230086, 2230087 | Y |
|                                           | Aminophylline                  | R03DA05                 | 14923, 178497, 497193, 497193, 497207, 582654, 582662, 868450, 2014270, 2014289                                                                                                                                                                                                                         | Y |
| Inhaled anticholinergics                  | Ipratropium bromide            | R01AX03                 | 2246084, 2246083, 2163705, 2163713, 2240508, 2240072                                                                                                                                                                                                                                                    | N |
|                                           |                                | R03BB01                 | 2126222, 2243827, 2231494, 731439, 576158, 2247686, 824216, 2026759, 1950681, 2239131, 2216221, 2210479, 2231785, 2236934, 2236935, 2237134, 2237135, 2239627, 2231135, 2231136, 2231245, 2231244, 2097141, 2097176, 2097168                                                                            | N |
|                                           | Ipratropium bromide, fenoterol | R03AK03                 | 02148633                                                                                                                                                                                                                                                                                                | N |
|                                           | Tiotropium bromide             | R03BB04                 | 02246793                                                                                                                                                                                                                                                                                                | N |
| Other beta-agonists                       | Epinephrine                    | R03AA01                 | 2017555, 466417, 525103, 1927582                                                                                                                                                                                                                                                                        | N |
|                                           | Ephedrine                      | R03CA02                 | 2237085, 2229698, 2100231, 2100258, 2243148, 2236722, 2229678, 2219743, 2012111, 2229711, 38121, 2242961, 876534, 893323, 893331, 438847, 2242639, 2126419, 2126400                                                                                                                                     | N |
|                                           | Isoprenaline                   | R03AB02                 | 2017652                                                                                                                                                                                                                                                                                                 | N |
|                                           | Orciprenaline                  | R03AB03                 | 1923870, 1928449, 2017660, 254134, 3859                                                                                                                                                                                                                                                                 | N |
| Other corticosteroids                     | Cortisone                      | H02AB10                 | 280437, 16241, 16446, 16438                                                                                                                                                                                                                                                                             | N |
|                                           | Triamcinolone                  | H02AB08                 | 2194090, 15016, 15024, 2194082                                                                                                                                                                                                                                                                          | N |

|                            |                           |         |                                                                                                                                                                                                                                                                                           |   |
|----------------------------|---------------------------|---------|-------------------------------------------------------------------------------------------------------------------------------------------------------------------------------------------------------------------------------------------------------------------------------------------|---|
|                            | Prednisone                | H02AB07 | 610623, 598194, 550957, 312770, 252417, 210188, 868426, 868434, 868442, 21695, 232378, 607517, 508586, 156876, 271373, 271381                                                                                                                                                             | N |
|                            | Prednisolone              | H02AB06 | 21679, 2230619, 2152541, 2245532                                                                                                                                                                                                                                                          | N |
|                            | Methylprednisolone        | H02AB04 | 1934325, 1934333, 1934341, 30759, 30767, 36129, 30988, 2245406, 2245400, 2245408, 2245407, 2241229, 2231893, 2231894, 2231895, 2232750, 2232748, 2063727, 2063697, 2063719, 2063700, 36137, 2230210, 2230211, 30678, 30651, 30643                                                         | N |
|                            | Betamethasone             | H02AB01 | 2237835, 36366, 2063190, 176834, 28096, 28185                                                                                                                                                                                                                                             | N |
|                            | Hydrocortisone            | H02AB09 | 888222, 888230, 888206, 888214, 30910, 30929, 872520, 872539, 878618, 878626, 30635, 30600, 30619, 30627                                                                                                                                                                                  | N |
|                            | Dexamathasone             | H02AB02 | 2261081, 2250055, 213624, 16462, 354309, 716715, 874582, 1977547, 664227, 2204274, 2204266, 295094, 285471, 489158, 2239534, 732893, 732885, 2260301, 2237044, 2260298, 2237046, 2237045, 1946897, 1964976, 1964968, 1964070, 2279363, 783900, 751863, 2311267, 2240687, 2240685, 2240684 | N |
| Other xanthines            | Theophylline, combination | R03DA54 | 545090, 476374, 334510, 356123, 792942, 721301, 317225, 828718, 640093, 828726, 828742, 307548                                                                                                                                                                                            | N |
| Other anti-allergic agents | Levocabastine             | R01AC02 | 2020017                                                                                                                                                                                                                                                                                   | N |
|                            | Ketotifen                 | R06AX17 | 2221330, 2176084, 2230730, 2218305, 2231680, 2231679, 600784, 577308                                                                                                                                                                                                                      | N |

## 2. Details of the statistical models

The main model for the analysis is a conditional logistic regression model stratified within each case and its corresponding controls, with adjustment for gender as well as the exact values of all the parameters used for matching. The coefficient estimated from this model for regular use covariates (*rICS rLABA rICSLABA*) provides the logarithm of the RR of the outcome for regular users versus no users. The CONTRAST statement is used to estimate the RR between regular users. This effectively means changing the reference group within the same regression model.

In order to estimate the RR between regular users and non-regular users (consisting of no users and irregular users combined), the same model was used, only that the covariates for irregular use (*iICS iLABA iICSLABA*) were removed, so that the coefficient for the regular use variables provide the logarithm of the RR for regular users versus non-regular users of the study drugs.

For the analysis of the impact of the regularity of ICS use among regular LABA users, we created a new variable, *nICSq*, the number three-month periods in the 12 months prior to the index date in which at least one ICS prescription is filled. We recoded the regular ICS+LABA use as regular LABA use (*rLABA=1*) with *nICSq=4*.

The coefficient for *rLABA* captures the independent effect of LABA, the *nICSq* capture the independent impact of the regularity of ICS use, and the interaction term *rLABA\*nICSq* captures the impact of the regularity of ICS use among LABA users. For those who received ICS in *n* quarters, the *RR* can be estimated as

A similar approach was used to study the impact of the regularity of LABA use among regular ICS users. This time, a variable *nLABAq* was defined as the number three-month periods in the 12 months prior to the index date in which at least one LABA prescription is filled, and the above approach was repeated.

### 3. Regression coefficients for the main analysis

| Variable                                                                                   | Estimate (95% CI)      | P-value |
|--------------------------------------------------------------------------------------------|------------------------|---------|
| Regular ICS use                                                                            | 0.716 (0.630 - 0.815)  | <0.001  |
| Regular LABA use                                                                           | 1.802 (1.204 - 2.698)  | 0.004   |
| Regular ICS+LABA use                                                                       | 0.817 (0.685 - 0.974)  | 0.024   |
| Age at entry*                                                                              | 1.034 (0.983 - 1.088)  | 0.194   |
| female                                                                                     | N/A (exact matching)   |         |
| Number of asthma-related hospitalization **                                                | 8.860 (6.988 - 11.232) | <0.001  |
| Number of asthma-related outpatient services *                                             | 1.081 (1.073 - 1.089)  | <0.001  |
| Number of oral or injected steroid dispensations*                                          | 1.074 (1.048 - 1.101)  | <0.001  |
| Number of nebulised or oral beta-adrenergic agonist dispensations*/10                      | 2.125 (2.065 - 2.187)  | <0.001  |
| Number of short-acting beta-agonist dispensations*                                         | 1.058 (1.039 - 1.077)  | <0.001  |
| Total number of asthma-related drugs (except beta agonists and steroids)*                  | 0.971 (0.956 - 0.986)  | <0.001  |
| Number of non-asthma related hospitalizations#                                             | 1.218 (1.155 - 1.286)  | <0.001  |
| Number of non-asthma related outpatient services/10                                        | 0.998 (0.997 - 0.998)  | 0.013   |
| Number of non-asthma related drug dispensations/10                                         | 1.001 (1.000 - 1.001)  | 0.009   |
| Charlson comorbidity index                                                                 | 1.127 (1.071 - 1.185)  | <0.001  |
| High income                                                                                | 0.869 (0.804 - 0.940)  | <0.001  |
| * Residual effect after matching, RRs are not nominally interpretable                      |                        |         |
| # During the first 12 months after entry                                                   |                        |         |
| % Top five deciles were considered as high income, estimated at the year of the index date |                        |         |

## 4- Description and results of sensitivity analyses

The first sensitivity analysis was an 'unadjusted' analysis performed by removing all covariates from the conditional logistic model (this analysis was still based on the matched data and therefore controlled for the effect of asthma severity through matching).

In the second analysis, we adjusted for asthma-severity variables in the regression, but did not match cases and controls on such variables. A history of asthma-related hospitalisation can be a confounding factor in that it often affects subsequent treatment decisions and is also a predictor of future hospitalisations; as such, in a sensitivity analysis we removed subjects that had any history of asthma-related hospitalisation during the baseline period.

In the next analysis, instead of matching on any asthma-related admissions in baseline, matching was performed on the number of such admissions in baseline. This analysis results in total balance of asthma-related admissions in the baseline but also results in loss of some cases because of lack of suitable controls.

Further, oral or injectable corticosteroids might act as a substitute for ICS during episodes of asthma exacerbation; this might result in the termination of exposure to ICS at the time the person is at a high risk of experiencing the outcome, causing a reverse-causality bias. To control for this potential bias, in another sensitivity analysis we combined oral, injectable, and inhaled corticosteroids into one category (so the exposure to ICS in this scenario also includes exposure to oral or injectable corticosteroids).

Similarly, while the intensity of exposure to SABA is a widely used surrogate for asthma severity (23,27,30), patients who initiate LABA might be instructed to stop or reduce their SABA intake irrespective of the underlying asthma severity, potentially causing bias due to the confounding factor being affected by the exposure (31). As such, in another sensitivity analysis we removed the variable representing SABA dispensations from matching and the regression model.

In another sensitivity analysis, we removed the adjustment made in the main analysis for the effect of individuals' stockpiling their medications.

Finally, because the risk of asthma-related death and hospitalisations are potentially correlated, death might act as an informative censoring mechanism. To test if censoring due to asthma-related death might have affected the results, we repeated the analysis using the compound outcome of asthma-related death or hospitalisation.

| <b>Table A1: Results of the sensitivity analyses (rate ratios)</b>                |                             |                              |                                     |
|-----------------------------------------------------------------------------------|-----------------------------|------------------------------|-------------------------------------|
| <b>Scenario</b>                                                                   | <b>ICS+LABA<br/>vs. ICS</b> | <b>ICS+LABA<br/>vs. LABA</b> | <b>ICS+LABA<br/>vs. no exposure</b> |
| <b>Main analysis</b>                                                              | <b>1.14 (0.93 - 1.41)</b>   | <b>0.45 (0.29 - 0.70)</b>    | <b>0.90 (0.75 - 1.08)</b>           |
| With matching but without adjustment for asthma severity                          | 1.10 (0.88 - 1.37)          | 0.51 (0.33 - 0.79)           | 0.87 (0.72 - 1.05)                  |
| Without matching but with adjustment for asthma severity                          | 1.09 (0.85 - 1.41)          | 0.34 (0.21 - 0.56)           | 0.81 (0.65 - 1.00)                  |
| Removing individuals with asthma-related hospitalisations in the baseline period, | 0.98 (0.77 - 1.25)          | 0.47 (0.30 - 0.75)           | 0.78 (0.63 - 0.96)                  |



|                                                                                                                                                |                    |                    |                     |
|------------------------------------------------------------------------------------------------------------------------------------------------|--------------------|--------------------|---------------------|
| cases=2,913                                                                                                                                    |                    |                    |                     |
| Matching on the number of admissions at baseline ( <i>as opposed to any-asthma-related hospitalisation in the main analysis</i> ), cases=3,286 | 1.11 (0.88 - 1.39) | 0.50 (0.32 - 0.78) | 0.85 (0.70 - 1.04)  |
| Exposure to ICS also including oral steroids                                                                                                   | 1.01 (0.82 - 1.25) | 0.45 (0.28 - 0.72) | 0.99 (0.81 - 1.21)  |
| Removing SABA as a covariate from the matching & regression                                                                                    | 1.03 (0.82 - 1.29) | 0.51 (0.33 - 0.78) | 0.81 (0.67 - 0.98)  |
| Not adjustment for stockpiling                                                                                                                 | 1.09 (0.87 - 1.38) | 0.46 (0.30 - 0.72) | 0.86 (0.70 - 1.05), |
| Outcome defined as asthma-related death or hospitalisation*, cases=3,346 (27 deaths)                                                           | 1.13 (0.90 - 1.42) | 0.50 (0.32 - 0.78) | 0.88 (0.73 - 1.07)  |
| *Asthma-related death was defined as a record of death in the vital statistics database with an ICD-10 code of J45 or J46.                     |                    |                    |                     |

## References

1. Suissa S, Ernst P, Kezouh A. Regular use of inhaled corticosteroids and the long term prevention of hospitalisation for asthma. *Thorax*. 2002 Oct;57(10):880–4.
2. Wells KE, Peterson EL, Ahmedani BK, Severson RK, Gleason-Comstock J, Williams LK. The relationship between combination inhaled corticosteroid and long-acting  $\beta$ -agonist use and severe asthma exacerbations in a diverse population. *J. Allergy Clin. Immunol*. 2012 May;129(5):1274–1279.e2.
3. Blais L, Suissa S, Boivin JF, Ernst P. First treatment with inhaled corticosteroids and the prevention of admissions to hospital for asthma. *Thorax*. 1998 Dec;53(12):1025–9.
4. Weinberg CR. Toward a clearer definition of confounding. *Am. J. Epidemiol*. 1993 Jan 1;137(1):1–8.
